# Towards Universal Cell Embeddings: Integrating Single-cell RNA-seq Datasets across Species with SATURN

Yanay Rosen<sup>1,\*</sup>, Maria Brbić<sup>2,\*</sup>, Yusuf Roohani<sup>3,\*</sup>, Kyle Swanson<sup>1</sup>, Ziang Li<sup>4</sup>, Jure Leskovec<sup>1,†</sup>

<sup>1</sup> Department of Computer Science, Stanford University, Stanford, CA, USA

<sup>2</sup> School of Computer and Communication Sciences, Swiss Federal Institute of Technology (EPFL), Lausanne, Switzerland

<sup>3</sup> Department of Biomedical Data Science, Stanford University, Stanford, CA, USA

<sup>4</sup> Department of Computer Science and Technology, Tsinghua University, Beijing, China

<sup>†</sup>Corresponding author. Email: [jure@cs.stanford.edu](mailto:jure@cs.stanford.edu)

\*These authors contributed equally

## Abstract

**Analysis of single-cell datasets generated from diverse organisms offers unprecedented opportunities to unravel fundamental evolutionary processes of conservation and diversification of cell types. However, inter-species genomic differences limit the joint analysis of cross-species datasets to orthologous genes. Here, we present SATURN, a deep learning method for learning universal cell embeddings that encodes genes' biological properties using protein language models. By coupling protein embeddings from language models with RNA expression, SATURN integrates datasets profiled from different species regardless of their genomic similarity. SATURN has a unique ability to detect functionally related genes co-expressed across species, redefining differential expression for cross-species analysis. We apply SATURN to three species whole-organism atlases and frog and zebrafish embryogenesis datasets. We show that cell embeddings learnt in SATURN can be effectively used to transfer annotations across species and identify both homologous and species-specific cell types, even across evolutionarily remote species. Finally, we use SATURN to reannotate the five species Cell**

**Atlas of Human Trabecular Meshwork and Aqueous Outflow Structures and find evidence of potentially divergent functions between glaucoma associated genes in humans and other species.**



## Introduction

Cell mapping consortia efforts have generated large-scale single-cell datasets comprising hundreds of thousands of cells with the goal of uncovering underlying cellular processes. In-depth analysis of diverse datasets generated across different species through global efforts such as the Human Cell Atlas [1, 2], the Mouse Cell Atlas [3] and the Fly Cell Atlas [4, 5] has broadened our understanding of cell biology characterizing many cell types for the first time. However, current analyses remain limited in their ability to jointly analyze datasets generated across different species. Such joint analysis offers great potential to unravel fundamental evolutionary processes and explain how cellular diversity links to anatomical and physiological variation across species.

A variety of linear [6] [7] and, more recently, deep learning approaches [8–10] have been developed to learn low-dimensional representations of single-cell RNA expression data (cell embeddings). However, existing methods represent genes only as columns of an RNA expression matrix and thus, do not account for the biological properties of genes. This severely limits their usability when analyzing datasets generated from different species in which only a subset of genes can be matched as one-to-one orthologs. While sequence alignment methods have been explored to incorporate weighted relationships between genes across species [11], they are dependent on arbitrary alignment thresholds and do not capture remote orthologues. Recent advances in protein language models trained on hundreds of millions protein sequences [12–14] suggest strong potential in addressing these issues by learning informative representations of the proteins a gene encodes. This is evidenced through the remarkable ability of protein representations to encode protein structure, function, molecular properties [12] and orthology [15]. However, so far, the representational power of these models has not been exploited to learn cell representations that capture functional similarity of genes.

We present SATURN (Species Alignment Through Unification of Rna and proteiNs), a deep learning approach that integrates cross-species scRNA-seq datasets by coupling gene expression with protein embeddings generated by large protein language models. By leveraging language model protein embeddings, SATURN introduces a concept of macrogenes defined as groups of functionally related genes. The strength of associations of genes to macrogenes are learnt to reflect the similarity of their corresponding protein embeddings. SATURN is uniquely able to perform multi-species differential expression analysis revealing functionally related groups of genes co-expressed across species. By mapping single-cell datasets generated with different genes to a joint embedding space, SATURN takes major steps towards universal cell embeddings.

We apply these embeddings to diverse tasks such as integration of cross-species cell atlas datasets, discovery of species specific cell types, reannotation and cross-species label transfer, as well as identification of protein differences across species. In particular, we apply SATURN to integrate Tabula Sapiens [2], Tabula Microcebus [16], and Tabula Muris [3] cell atlas datasets, creating a mammalian cell atlas of 335,000 cells across 9 common tissues. We further apply SATURN to integrate frog and zebrafish embryogenesis datasets [17]. Our results show that SATURN successfully transfers annotations even across evolutionarily remote species and finds homologous and species-specific cell types, outperforming existing cross-species integration methods by a large margin. Finally, we apply SATURN to reannotate the five species Cell Atlas of Human Trabecular Meshwork and Aqueous Outflow Structures [18]. We find that SATURN identifies glaucoma associated macrogenes that have potentially divergent functions across species.

## Results

**Overview of SATURN.** The major challenge of cross-species integration is that different datasets have different genes that may not have common one-to-one orthologs. Subsetting each species' set of genes to the common set of one-to-one orthologs leads to losing a large portion of biologically relevant genes. Increasing the number of species exacerbates this problem, since a gene must have an ortholog in each species in order to be considered for integration. SATURN overcomes this problem by using large protein language models to learn cell embeddings that encode biological meaning of genes. SATURN maps cross-species datasets in the space of functionally related genes determined by protein embeddings. SATURN's use of protein language models allows it to represent functional similarities even between remotely orthologous genes that are missed by integration methods that rely on sequence based similarity [11].

In particular, SATURN integrates scRNA-seq datasets generated from different species with different genes by mapping them to a joint low-dimensional embedding space using gene expression and protein representations. SATURN takes as input: (i) scRNA-seq count data from one or multiple species, and (ii) protein embeddings generated by a large protein embedding language model like ESM2 [14]. The language model takes a sequence of amino acids and produces a protein representation vector (Fig. 1a). Given gene expression and protein embeddings, SATURN learns an interpretable feature space shared between multiple species. We refer to this space as a macrogene space and it represents a joint space composed of genes inferred to be functionally

related based on the similarity of their protein embeddings. The importance of a gene to a macrogene is defined by a neural network weight – the stronger the importance, the higher the value of the weight that connects the gene to the macrogene.

Given the shared macrogene expression space across different species, SATURN then learns to represent cells across multiple species as nonlinear combinations of macrogenes. The neural network in SATURN is first pretrained with a conditional autoencoder with zero inflated negative binomial (ZINB) loss, regularized to reconstruct protein embedding similarities using gene to macrogene weights (Methods). Using the pretrained network as initialization, SATURN then learns a mapping of all cells to the shared embedding space with a weakly supervised metric learning objective. This allows SATURN to calibrate distances in the embedding space to reflect cell label similarity. In particular, the objective function in SATURN consists of two main components: (i) forcing different cells within the same dataset far apart using weak supervision; and (ii) forcing similar cells across datasets close to each other in an unsupervised manner (Methods). This objective enables SATURN to integrate cells across different species, while preserving cell type information within each species' dataset.

**SATURN creates multi-species cell atlases.** We applied SATURN to integrate large-scale single cell atlas datasets generated from human (Tabula Sapiens), mouse lemur (Tabula Microcebus) and mouse (Tabula Muris), creating the first mammalian cell atlas of 335,000 cells (Fig. 1b). We found that major cell types aligned well across three species such as granulocytes, myeloid and epithelial cells; and then analyzed the alignment on a per-tissue level. For example, in muscle, we found a small subcluster of cells labeled as mouse macrophages that grouped with human and lemur granulocytes while the rest of cells labeled as mouse macrophages aligned with human and lemur macrophages (Supplementary Fig. 1). To investigate whether this alignment is indeed correct, we checked the expression of known granulocyte marker *Cd55* [19] [20]. Interestingly, we found that this small subcluster labeled as mouse macrophage indeed expresses *Cd55*, indicating that this small cluster was wrongly annotated as macrophages while it should be annotated as granulocyte (Supplementary Fig. 2).

In spleen, SATURN separated out human naive B cells from human memory B cells, but aligned human memory B cells with cells annotated as B cells in mouse and lemur (Supplementary Fig. 3). To investigate whether this alignment is meaningful, we checked the marker genes and found that indeed mouse and lemur B cells express *Cd19*, a B cell marker known to be pref-

entially expressed in memory B cells, which was only weakly expressed in human naive B cells (Supplementary Fig. 4) [21]. This indicates that mouse and lemur B cells are correctly clustered with human memory B cells, which is additionally confirmed by strong expression of *Cd19*. Thus, SATURN can be used to obtain fine-grained level annotations when cell atlases have been annotated with different granularity levels. Additionally, we found that SATURN correctly identified cell types specific to a single species within the integrated datasets. For instance, in muscle tissue, SATURN separated human epithelial and mesothelial cells from all other cell types (Supplementary Figure 1). These cell types are indeed absent in mouse and lemur datasets. In spleen, SATURN separated human erythrocytes (Supplementary Figure 3).

We next applied SATURN to a multi species dataset of frog (97,000 cells) and zebrafish (63,000 cells) embryogenesis [17]. SATURN aligned evolutionary related cell types between these two remote species (Fig. 1c). We further inspected small clusters that are aligned by SATURN, but their ground-truth cell type annotations differ. We find that these clusters indeed correspond to related cell types. For example, SATURN integrated zebrafish macrophages and frog myeloid progenitors which can differentiate into macrophages. These cell types are embedded close to blood cells which further demonstrates that local distances in SATURN's embedding space are meaningful.

**SATURN performs differential expression on macrogenes.** SATURN extends differential expression analysis to a multi species setting. Instead of performing differential expression analysis on individual genes, which is highly limited when datasets do not share genes, SATURN performs differential expression on macrogenes, which enables characterization of cell-type specific macrogenes across different datasets. To perform differential expression on macrogenes, SATURN first aggregates the contributions of individual genes to macrogenes using gene-macrogene neural network weights (Fig. 2a). The aggregated values can be seen as macrogene expression for each individual cell. Like in conventional differential expression analysis, SATURN then performs differential expression on cell clusters, such as those determined by cell type label. The difference compared to conventional differential expression is that in SATURN the statistical test is performed on the macrogenes. Finally, to interpret the biological meaning of a macrogene, SATURN considers genes with the highest weight to the macrogene.

By performing macrogene differential expression SATURN has two major advantages over existing integration methods. First, SATURN can identify differentially expressed genes that lack

a one-to-one ortholog. This is in contrast to existing methods that rely on one-to-one orthologs and therefore ignore unmapped genes. Second, differentially expressed macrogenes provide natural gene modules that aid in interpretation, since they rely on groups of related genes instead of individual genes. This can lead to identification of shared gene programs across species.

We conduct macrogene differential expression analysis in frog and zebrafish embryogenesis datasets. We demonstrate examples for the macrophage/myeloid progenitor cluster (Fig. 2b) and for the ionocytes cluster (Fig. 2b). In particular, we show the top five differentially expressed macrogenes and their corresponding highly weighted genes that characterize them, and we name each macrogene according to the gene with the highest weight to that macrogene. We focus on genes with known annotations.

For both macrophage/myeloid progenitors and ionocyte cell types we find that highly expressed macrogenes indeed capture groups of related genes that are known to have the function associated with these cell types. In particular, for macrophage/myeloid progenitors, the top differentially expressed macrogenes include *Arghdi*, *Cebp*, *Ptp*, *Cybb* and *Lcp1* (Fig. 2b). All these macrogenes contain genes associated with functions in blood cells. For example, the *Arghdi* macrogene contains frog and zebrafish orthologs of *Arhgdig*, as well as frog specific paralogs such as *Arhgdib* and *Arhgdia*, which are involved in Rho protein signal transduction and RacGTPase binding activity [22,23]. RhoGTPases play an important role in hematopoietic stem cell functions [24]. Similarly, the *Cebp* macrogene contains frog and zebrafish orthologs of *Cebpd*, *Cebpb* and *Cebpa*. *Cebpa* is associated with zebrafish hemopoiesis and *Cebpb* is known to be expressed in zebrafish macrophages [22,23].

For ionocytes, SATURN ranks *Foxi*, *Dmr2*, *Cldn*, *Ubp* and *Atp6v0* as top five differentially expressed macrogenes (Fig. 2b). Indeed, we find that all these macrogenes contain genes that are known to be associated with ionocytes. *Foxi* consists of Fox transcription factors that are known ionocyte markers [25]. The *Dmrt2* macrogene contains *Dmrt2* and *Dmrt2a*. *Dmrt2* is a known ionocyte marker in human pulmonary ionocytes [26]. The *Cldn* macrogene contains various claudins, which are found in gill ionocytes of teleost fish like zebrafish [27].

Moreover, macrogene differential expression can also be used to find species-level differences between cell types conserved across species. For example, when comparing zebrafish and frog ionocytes a macrogene represented by *Gnpda1*, *Apip*, *Paics* and a macrogene represented by *Ppp1r14b* and *Fosab* are specific to zebrafish, while a macrogene represented by *Gadd45g*, *Aen*, and *Msgn1* is highly expressed in frog ionocytes but not in zebrafish (Fig. 2c).

**Macrogenes capture orthology.** We find that macrogenes generated by SATURN recapture sequence-based gene orthologs. In particular, we computed the proportion of macrogenes with an orthologous gene pair between zebrafish and frog among their top ranked genes. To assess gene orthology, we use BLASTP, which determines gene orthologs based on protein amino acid sequence similarity [28]. We find that even with only two top ranked genes, 56% macrogenes in SATURN recapture gene orthology information, while by considering ten top ranked genes 91.2% of macrogenes recapture gene orthology information (Fig. 2d). In comparison, random assignment of genes to macrogenes results in orthologous pairs in only 0.25% of macrogenes when considering two top ranked genes and in only 18.8% macrogenes when considering ten top ranked genes. Altogether, these results not only indicate that macrogenes in SATURN recapture orthology information, but that they can also be used to reveal functional similarities between genes even when these genes are not considered as orthologs by sequence based similarity tools such as BLASTP.

**SATURN outperforms other methods by a large margin.** We quantitatively assess the performance of SATURN on the alignment of frog and zebrafish embryogenesis datasets. We evaluate performance by measuring how well labels can be transferred from zebrafish to frog. In particular, we first integrate the datasets using SATURN and then use the cell-type annotations of cells from a reference species, zebrafish, to train a logistic classifier to predict cell types [29] (Supplementary Note 3). The classifier's performance is then tested on the embeddings of the query species, frog (Fig. 3a). Predictions are assessed as correct if they match the known frog cell type. Since not all frog cells can be mapped to zebrafish cells, the maximum possible accuracy of such a model is 93%.

We compare the performance of SATURN to another single cell multi species integration method, SAMap [11], and unsupervised integration methods Harmony [6], scVI [8] and Scanorama [7]. SAMap is run in a weakly supervised mode in which cell neighborhoods are determined by a cell type, which is the same setting as SATURN. SAMap is initialized with a gene graph based on protein sequence similarity as determined by BLASTP. For the unsupervised methods, the input genes for each species are taken as the one-to-one orthologs as determined by ENSEMBL [30]. We found that SATURN achieves 85.8% median accuracy in cell label transfer from zebrafish to frog, achieving remarkable 119% performance gain over the next best performing method, SAMap (Fig. 3b). We obtain similar performance gains when transferring labels from frog to zebrafish (Supplementary Figure 5). Performance gains of SATURN are retained using other evaluation metrics,



such as F1-score, precision and recall (Supplementary Fig. 6). To test whether choice of protein language model for obtaining protein embeddings affects SATURN's performance, we compared ESM2 embeddings [14] to ESM1b [12] and ProtXL [13]. The results show that SATURN is highly robust to the choice of protein language model (Supplementary Fig. 7), as well as to the number of macrogenes (Supplementary Fig. 8).

We further compare SATURN's ability to generate cell clusters that reflect conserved cell types across species, to the best baseline approach (SAMap). For each frog cell type we analyze its cross-species neighborhood by computing the cell type frequency of its nearest cross-species neighbors in the embedding space. We find that SATURN generates cell clusters that are both species heterogeneous and cell type homogeneous (Fig. 3c). For the most commonly occurring cell types, SATURN's neighborhoods are consistently highly homogeneous. On the other hand, this is not the case for SAMap where the neighborhoods are typically cell type heterogeneous. For example, forebrain/midbrain, hindbrain, optic and eye primordium clusters are intermixed using SAMap but clearly distinguished using SATURN. SATURN aligns rare cell types such as notoplate, which only has 339 frog cells and 115 zebrafish cells. For a few very rare cell types, such as germline, which has only 33 frog cells and 53 zebrafish cells, SATURN and SAMap both fail to align. SATURN and SAMap fail to directly align additional rare cell types such as olfactory placode and hatching gland. However, SATURN aligns these cell types to functionally related cell types: 77% of olfactory placode cells are mapped to placodal area for SATURN (37% for SAMap) and 66% of hatching gland cells are mapped to another component of the EVL, the periderm, which is not case with SAMap (36% epidermal progenitor, 33% blastula).

We visually inspected low-dimensional embeddings produced by SATURN and other baselines by projecting them into a two-dimensional UMAP space [31]. We find that in SATURN's embedding space different cell types form separate clusters while cell types conserved across species are mixed together (Fig. 3d). On the other hand, existing methods are not able to produce biologically meaningful cell embeddings that reflect evolutionary signatures. In particular, Harmony, scVI and Scanorama fail to integrate datasets across remote species. While SAMap is able to integrate datasets across species, the cell type information in its embedding space is no longer preserved and different cell types intermingle.

**SATURN integrates five species from the Aqueous Humor Outflow cell atlas.** SATURN scales to large datasets and it can handle multiple datasets at once. We apply SATURN to integrate five

species Cell Atlas of Human Trabecular Meshwork and Aqueous Outflow Structures (AH atlas) [18]. The AH atlas contains 50,000 cells from human, cynomolgus macaque, rhesus macaque, mouse and pig. SATURN jointly aligns different species in the embedding space, identifying many conserved cell types between these species (Fig. 4a). SATURN embeddings suggest that cell types including melanocytes, macrophages, and ciliary muscle align in all species, as do cell types that are present only in a subset of species like fibroblasts and collector channel.

SATURN can be used to reannotate cell types and correct for incomplete annotations by aligning datasets across multiple species. To demonstrate that, we use SATURN to regroup cell types from the original AH atlas in a multi-species context. We focus on beam cells (beam A/B/X/Y), fibroblasts, JCT (juxtacanalicular tissue) cells, and corneal endothelium cells, due to their differential conservation across the five species profiled in the atlas.

Among these 21 cell types, SATURN found 5 broad clusters. The first cluster contains mouse beam cells and fibroblasts from pig, human and rhesus macaque, which we relabel as fibroblasts. The reannotated mouse beam cells are indeed characterized as having high expression of fibroblast marker genes (Supplementary Fig. 9, Supplementary Table 1). The second cluster contains beam A cells from pig, human, rhesus macaque and a mouse uveal cluster, which we reannotate as beam A cells. The third and fourth clusters contain beam X, beam B and JCT cells, which we reannotate as JCT cells, as beam X cells were only found in the two macaque species and beam B cells were only found in human. The fifth cluster contains the human Schwalbe line cells, and pig and mouse corneal endothelium cells. Within these new cell type groupings, we find differentially expressed macrogenes that recapture specific cell type marker genes (Supplementary Fig. 9, Supplementary Table 1).

**SATURN discovers orthologous genes with different functions across species.** SATURN facilitates analysis of protein embeddings through the creation of macrogenes. We investigate the macrogenes corresponding to glaucoma related genes from each species in the AH atlas (Fig. 4d). While pig, mouse, cynomolgus and rhesus macaque *Myoc* gene are expectedly linked to the same macrogene, we find that the human *Myoc* gene is not linked to that macrogene. Interestingly, the human *Myoc* gene has the highest weight to a macrogene containing human *A2m*, which is a non orthologous gene that has also been associated with glaucoma [32], and a number of different non human species' genes such as mouse *Folr1*, mouse *Fbln2*, mouse *Srgn*, and pig *SCP2d1*. *A2m* genes from non-human species have the highest weights to the same macrogene. This analysis



demonstrates that protein embeddings in SATURN and their association to macrogenes can be used to find sequence-based gene orthologs with potentially different functions across species.

## Discussion

SATURN represents the first model that combines protein embeddings generated using large protein language models with gene expression from scRNA-seq datasets. By coupling protein embeddings with gene expression, SATURN learns universal cell embeddings that bridge differences between individual single-cell experiments even when they have different genes.

SATURN has a unique ability to map heterogeneous datasets to an interpretable space of macrogenes defined as groups of functionally related genes. In SATURN, every gene has a weight to a macrogene which defines an importance of that gene to a macrogene. This enables SATURN to perform differential expression in the macrogene space and identify gene programs shared across different datasets. SATURN represents cells as nonlinear combinations of macrogenes. To integrate datasets, the objective function introduced in SATURN learns distance metrics from weakly supervised data which forces cells to cluster according to their cell types.

SATURN allows for integration of datasets generated across multiple different species. SATURN is a scalable approach which makes it applicable to large-scale cross-species cell atlas datasets. Our approach also has important implications for the creation of new multi-omic machine learning methods, including those that incorporate protein assay information (e.g. CITE-seq [33]), genotype, or those that assay a limited section of the transcriptome (e.g. MERFISH [34]).

Finally, SATURN generates cell embeddings that can be used for many downstream tasks. These tasks include but are not limited to dataset integration, discovery of conserved and species-specific cell types, differential macrogene expression analysis, cell type reannotation, signature set enrichment, gene module determination [35], RNA velocity [36], or trajectory inference [37]. As single cell transcriptomics is applied to an increasing number of species, we expect SATURN will be an important tool for comprehending conservation and diversification of cell types across species and revealing fundamental evolutionary processes.

## Methods

**Overview of SATURN.** SATURN takes multiple single cell RNA expression count datasets generated from  $S$  species  $\mathbf{X}^{s_1}, \mathbf{X}^{s_2} \dots \mathbf{X}^{s_S}$  where  $\mathbf{X}^{s_i} \in \mathbb{N}^{C_{s_i} \times |\mathcal{G}_{s_i}|}$  where  $C_{s_i}$  is the number of cells in species  $s_i$  and  $\mathcal{G}_{s_i}$  is the set of genes in species  $s_i$ . Besides count matrices, SATURN also takes as input  $p$ - dimensional protein embeddings  $\mathbf{P} \in \mathbb{R}^{|\mathcal{G}| \times p}$  generated from large protein language models where  $\mathcal{G} = \cup_{i=1}^S \mathcal{G}_{s_i}$ .

SATURN maps multi-species expression data to a joint low dimensional macrogene expression space by learning a set of macrogenes  $\mathcal{M}$  with weights  $\mathbf{W} \in \mathbb{R}^{+|\mathcal{G}| \times |\mathcal{M}|}$  where  $\mathbf{W}_{g,m} \in \mathbb{R}^+$  is a weight from a macrogene  $m \in \mathcal{M}$  to a gene  $g \in \mathcal{G}$ . SATURN generates final  $k$ -dimensional latent cell embeddings by combining macrogenes using an encoder neural network  $f : \mathbb{R}^{|\mathcal{M}|} \rightarrow \mathbb{R}^k$ .

**Macrogenes initialization.** SATURN initializes macrogenes by soft-clustering protein embeddings. In particular, SATURN first clusters protein embeddings using the K-Means algorithm [38]. Given a matrix that stores protein embeddings for all genes  $\mathbf{P} \in \mathbb{R}^{|\mathcal{G}| \times p}$ , SATURN applies K-Means to learn a set of centroids  $\mathcal{M} = \{\mathbf{m}_i \in \mathbb{R}^p\}_{i=1}^{N_M}$  where  $N_M$  defines the number of centroids/macrogenes. K-means minimizes the within-cluster sum of squares:

$$\sum_{g \in \mathcal{G}} \min_{\mathbf{m} \in \mathcal{M}} (\|\mathbf{P}_g - \mathbf{m}\|^2), \quad (1)$$

where  $\mathbf{P}_g$  denotes a row protein embedding vector of matrix  $\mathbf{P}$ . Here, each centroid  $\mathbf{m}$  represents a different macrogene. SATURN then defines an initial set of weights  $\{\{\mathbf{W}_{g,m} \in \mathbb{R}^+\}_{g=1}^{|\mathcal{G}|}\}_{m=1}^{|\mathcal{M}|}$  from each gene  $g$  to each macrogene  $m$  as:

$$\mathbf{W}_{g,m} = 2 * \left( \log \left( \frac{1}{\text{rd}_{m,g}} + 1 \right) \right)^2, \quad (2)$$

where  $\text{rd}_{m,g} : \mathbb{N} \rightarrow \mathbb{N}$  represents the ranked euclidean distance from gene  $g$  to a macrogene  $m$  and  $\text{rd}_{m,g} = 1$  for the nearest gene to a macrogene. This initialization function is arbitrarily chosen so that genes have the highest weights to the macrogenes they are closest to. Gene to macrogene weights are strictly positive, differentiable and updated during pretraining. We multiply by two so that the highest weights are close to 1.

**Pretraining with conditional autoencoder.** Following macrogene initialization, SATURN pretrains a network using a conditional autoencoder with zero inflated negative binomial (ZINB) loss [8]. The conditional autoencoder is composed of encoder and decoder modules. The en-

coder module first aggregates expression values using macrogene weights. In particular, for a cell  $c$  from species  $s$  with count values  $\mathbf{X}_c^s \in \mathbb{N}^{+|\mathcal{G}_s|}$ , genes  $g \in \mathcal{G}_s$  and macrogenes  $m \in \mathcal{M}$ , SATURN defines macrogene expression values  $\mathbf{e}_c \in \mathbb{R}^{+|\mathcal{M}|}$  as follows:

$$\mathbf{e}_c = \text{ReLU}(\text{LayerNorm}(\exp(\log \mathbf{W}_s^T) \log(\mathbf{X}_c^s + 1))) \quad (3)$$

$$\mathbf{W}_s^T = \begin{bmatrix} \mathbf{W}_{1,1} & \cdots & \mathbf{W}_{1,|\mathcal{G}_s|} \\ \cdots & \cdots & \cdots \\ \mathbf{W}_{|\mathcal{M}|,1} & \cdots & \mathbf{W}_{|\mathcal{M}|,|\mathcal{G}_s|} \end{bmatrix}, \quad (4)$$

where  $\text{ReLU}$  denotes the rectified linear unit used as the activation function and defined as  $\text{ReLU}(\cdot) = \max(0, \cdot)$  and  $\text{LayerNorm}$  is layer normalization [39]. The encoder module  $f$  consists of two fully connected neural network layers with  $\text{ReLU}$  activation, layer normalization and dropout, and takes as an input  $\mathbf{e}_c \in \mathbb{R}^+$  and outputs a low dimensional embedding  $\mathbf{z}_c \in \mathbb{R}^k$ :

$$\mathbf{z}_c = f(\mathbf{e}_c). \quad (5)$$

A one hot representation of the species  $s$  is concatenated to the embedding  $(\mathbf{z}_c || \mathbf{1}_s)$  and passed forward to the decoding module. The decoding module outputs three distinct heads, parameterizing  $|\mathcal{G}|$  zero inflated negative binomial distributions with  $\boldsymbol{\mu}_c \in \mathbb{R}^{+|\mathcal{G}|}$ ,  $\mathbf{O}_c \in \mathbb{R}^{|\mathcal{G}|}$ ,  $\boldsymbol{\theta} \in \mathbb{R}^{+|\mathcal{G}|}$ .

$$\boldsymbol{\mu}_c = \text{Softmax}(\mathbf{W}_s D_\mu(D_S(\mathbf{z}_c || \mathbf{1}_s))) \sum \mathbf{X}_c^s \quad (6)$$

$$\mathbf{O}_c = D_O(D_S(\mathbf{z}_c || \mathbf{1}_s)) \quad (7)$$

$$\boldsymbol{\theta}, \quad (8)$$

where  $D_S$ ,  $D_\mu$  and  $D_O$  represent fully connected neural network layers.  $D_S$  and  $D_\mu$  have  $\text{ReLU}$  activation, dropout and layer normalization.  $\boldsymbol{\theta}$  is a differentiable parameter of the model.

The autoencoder reconstruction loss  $\mathcal{L}_{rc}$ , is calculated as the negative log likelihood of a zero inflated negative binomial distribution [8] parameterized as:

$$\text{ZINB}_{c,g} \approx \begin{cases} \text{Poisson}(\text{Gamma}(\boldsymbol{\theta}_g, \boldsymbol{\theta}_g / \boldsymbol{\mu}_{cg})), & \text{if Bernoulli}(\frac{\exp \mathbf{O}_{cg}}{1 + \exp \mathbf{O}_{cg}}) = 0 \\ 0, & \text{otherwise} \end{cases} \quad (9)$$

$$\mathcal{L}_{rc} = \sum_{g \in \mathcal{G}_s} -\log(\mathbb{P}(\text{ZINB}_{c,g} = \mathbf{X}_{cg})), \quad (10)$$

where  $\mathbb{P}$  denotes probability. To ensure that gene to macrogene weights reflect similarity in protein embedding space, we add an additional loss term  $\mathcal{L}_s$  defined as follows:

$$\mathcal{L}_s = \text{MSE}(\text{sim}(\mathbf{B}, \mathbf{B}_{\text{shuffled}}), \text{sim}(\mathbf{P}, \mathbf{P}_{\text{shuffled}})), \quad (11)$$

where  $\mathbf{B} = Q(\mathbf{W})$  and  $Q : \mathbb{N}_+^{|\mathcal{M}|} \rightarrow \mathbb{N}^n$  is a fully connected neural network layer with ReLU activation, layer normalization and dropout, that encodes macrogene weights. MSE denotes mean squared error and  $\text{sim}$  is the cosine similarity. The encoded macrogene weights  $\mathbf{B} \in \mathbb{R}^{|\mathcal{G}| \times n}$  and protein embeddings  $\mathbf{P}$  are jointly shuffled row-wise (gene-wise).

The final pretraining loss  $\mathcal{L}_p$  that SATURN optimizes is defined as:

$$\mathcal{L}_p = \tau \mathcal{L}_s + \frac{1}{|\mathcal{C} \in \text{batch}|} \sum_{c \in \text{batch}} \mathcal{L}_{rc}, \quad (12)$$

where  $\tau$  is a regularization parameter and it is set to 1 in all experiments.

**Metric learning across species.** To automatically learn a distance metric across species, SATURN fine-tunes pretrained cell embeddings with a weakly supervised metric learning objective. In particular, SATURN relies on the triplet margin loss function:

$$\mathcal{L}_t = \max(D(\mathbf{z}_a, \mathbf{z}_p) - D(\mathbf{z}_a, \mathbf{z}_n) + m, 0), \quad (13)$$

where  $D$  is a cosine distance,  $a$ ,  $p$  and  $n$  denote an anchor cell, a positive cell and a negative cell, respectively, and the margin  $m$  is a tunable hyperparameter that we set to 0.2 in all experiments. Triplets are mined using semi-hard online mining in a weakly supervised fashion. To mine triplets, SATURN iterates over the species specific cell-type annotations, but no cross-species annotations are ever used. These within species annotations can be predetermined or generated in an unsupervised manner with clustering techniques like Leiden clustering [40]. For each annotation, SATURN selects all cells with that annotation from the same species as candidate anchor cells. Then for each anchor cell, SATURN selects candidate positive cells as mutual 1-nearest neighbors measured using cosine distance in the embedding space. Here, mutual means that if cell  $x$  from species  $s_1$  selected as its cross-species nearest neighbor cell  $y$  from species  $s_2$ , SATURN finds the nearest neighbor  $x'$  of cell  $y$  in species  $s_1$ . If cells  $x$  and  $x'$  from species  $s_1$  have the same annotation, then positive pairs are generated. The anchor cells and positive cells are pooled, and then matched such that each anchor cell candidate has a corresponding randomly selected positive cell

candidate from a different species. Finally, negative cells are randomly selected such that they have a different label than either the anchor label or the positive label. Triplets are semi-hard filtered such that:

$$D(\mathbf{z}_a, \mathbf{z}_p) < D(\mathbf{z}_a, \mathbf{z}_n) < D(\mathbf{z}_a, \mathbf{z}_p) + m. \quad (14)$$

During the fine-tuning stage, macrogene weights are not updated.

**Generation of protein embeddings.** Protein embeddings are generated by applying a pretrained protein embedding language model on each species' reference proteome. Protein embeddings generated by the ESM2 model [14] were used for all experiments. The ESM2 protein embedding model accepts a sequence of amino acids as an input and outputs a  $p = 5120$  dimensional vector representing the embedding of the protein. To obtain a protein embedding for a gene, the protein embeddings of all proteins available for the gene are averaged. Any protein embedding model, or any model that outputs numerical representations of genes, can be used as an input to SATURN (Supplementary Figure 7).

**Differential macrogene expression.** Differential expression on macrogene values is performed using a Wilcoxon rank sum test as implemented in SCANPY [41]. For a cell type annotation  $t$ , with cells  $c \in t$  (from any species), the test statistic  $U_m$  for macrogene  $m$  is calculated as:

$$U_m = R_m - \frac{|c \in t|(|c \in t| + 1)}{2} \quad (15)$$

$$R_m = \sum_{c \in t} \text{Rank}(m)[c], \quad (16)$$

where  $R(m)$  is the rank sum of cells with label  $t$  for macrogene  $m$ .

**Determining gene orthologs.** BLASTP with default settings was applied to publicly available reference proteomes from ENSEMBL. BLASTP orthology results were used to find ortholog gene pairs within the genes with highest weight to each macrogene (Fig. 2e). BLASTP results are also used for SAMap alignment (Fig. 3). The ENSEMBL orthology API was queried to determine one-to-one gene orthologs.

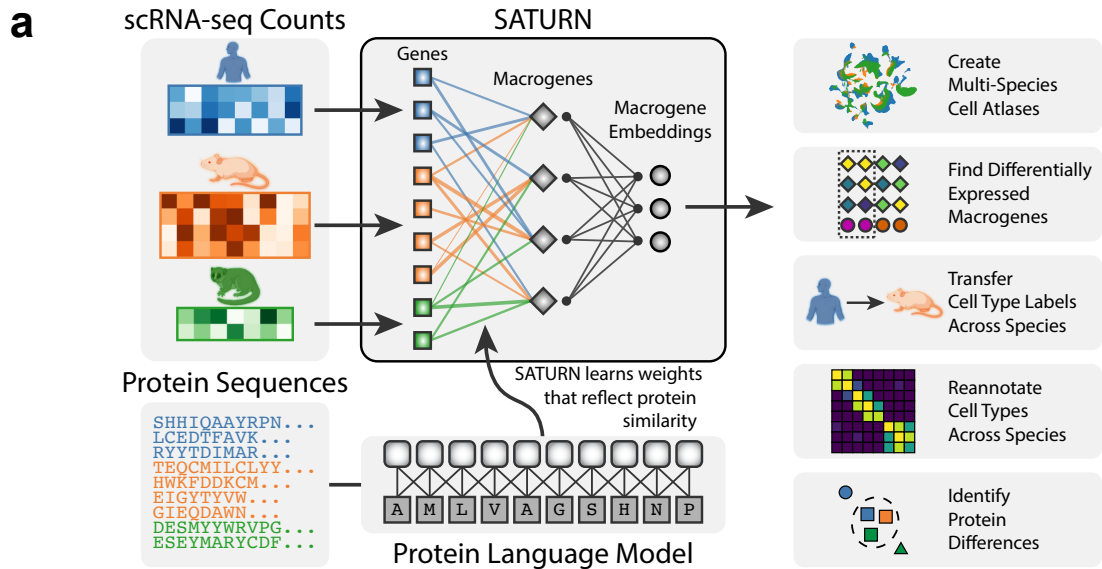

**b** Mammalian Cell Atlas

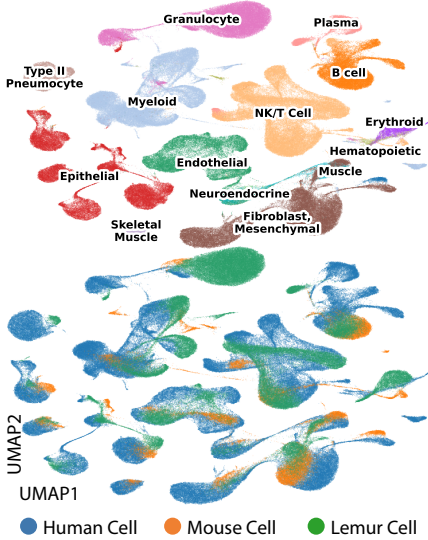

**c** Frog and Zebrafish Embryogenesis

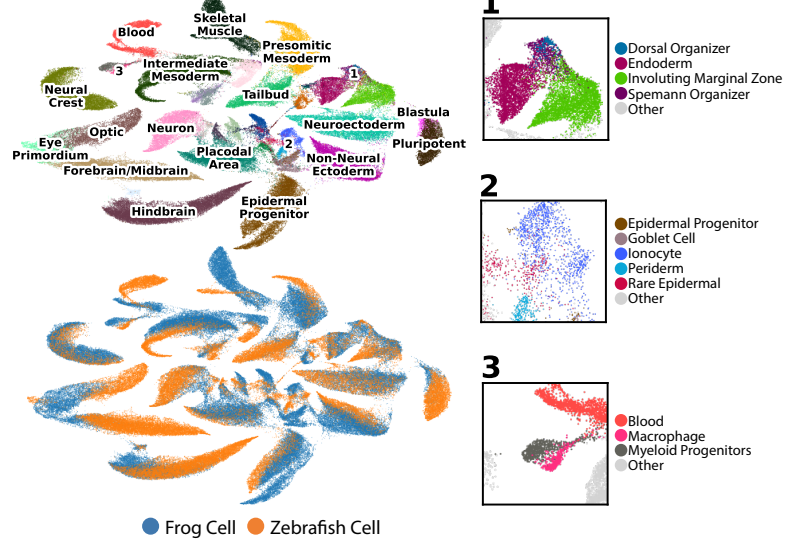

---

**Figure 1 (preceding page): SATURN incorporates protein sequences and gene expression to embed single cells.**

**(a)** Overview of SATURN. SATURN takes as input scRNA-seq datasets generated from one or more species and the amino acid sequences of proteins present in these species. SATURN then maps each species' genes to a joint feature space by learning “macrogenes”— groups of functionally related intra- and inter-species genes. Finally, in the shared macrogene space SATURN integrates datasets across species by learning a joint cell embedding space in which cell types conserved across species are aligned with each other. **(b)** UMAP visualization of a joint embedding space across three distinct species. We apply SATURN to integrate cell atlas datasets of 335,000 cells from Tabula Sapiens (human), Tabula Microcebus (mouse lemur) and Tabula Muris (mouse), creating a mammalian cell atlas. Colors denote coarse-grained cell type annotations (top) and species annotations (bottom). Only cell types with more than 350 cells were included. **(c)** UMAP visualization of SATURN's integration of datasets from frog (97,000 cells) and zebrafish (63,000 cells) embryogenesis. Colors denote different major cell types (top) and different species (bottom). In SATURN's embedding space, cell types conserved across species align well (*e.g.*, frog/zebrafish neural crest) while species-specific cell types form separate single species clusters (*e.g.*, frog goblet cells). Cell types not directly mapped between both species share similar ontology, for example the zebrafish dorsal organizer and frog Spemann organizer (inset 1). Epidermal cell types including periderm, epidermal progenitor, and rare epidermal cell types are also aligned, as are specialized epithelial cells such as goblet cells and ionocytes (inset 2). Finally, myeloid cell types including macrophages and myeloid progenitors cluster together (inset 3).



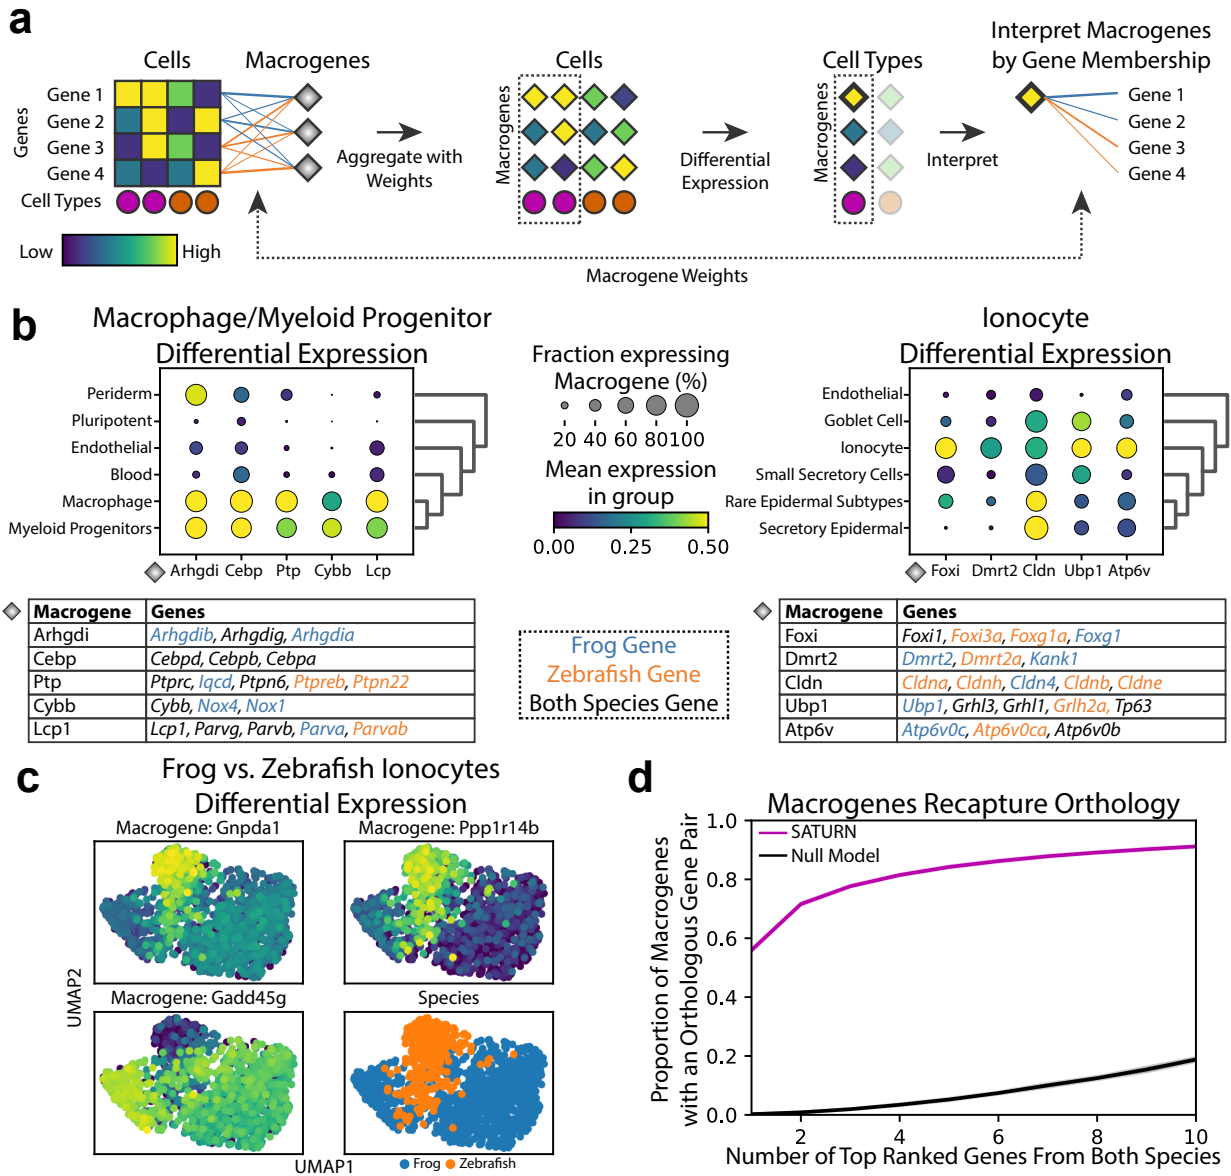



---

**Figure 2 (preceding page): SATURN enables multi species differential expression analysis in the macrogene space.** **(a)** Overview of SATURN 's differential expression analysis on macrogenes. Every gene is connected to a macrogene with a corresponding weight that represents the importance of that gene for a given macrogene. Thus, each cell has corresponding macrogene values calculated as the weighted and normalized sum of its gene expression values. Since SATURN operates in the macrogene space, differential expression for resulting cell clusters gives the set of differentially expressed macrogenes of a given cell type. Finally, the genes with the highest weights to a macrogene are used to determine the biological interpretation of that macrogene. **(b)** Differentially expressed macrogenes on frog and zebrafish embryogenesis datasets for **(left)** macrophage and myeloid progenitors and **(right)** ionocytes. Differential expression is performed by comparing these cell types with all other cell types. We show only cell types that are similar to target cell types determined as expressing a subset of the top differentially expressed macrogenes. We assign names to macrogenes based on the set of genes with the highest weight in the given macrogene. The tables show the top 5 differentially expressed macrogenes and the top weighted genes in each macrogene. Genes are shown in a black color if a gene is included in the top genes for both species in a given macrogene, and blue or orange if the gene is frog or zebrafish specific, respectively. **(c)** Macrogene differential expression can also be used to find species-level differences between cell types conserved across species. Example of differentially expressed macrogenes between frog and zebrafish ionocytes. **(d)** SATURN macrogenes contain a far higher proportion of ortholog gene pairs than what is expected by chance, demonstrating that SATURN recaptures sequence based orthology. Purple curve shows the proportion of SATURN macrogenes which contain, within their top ranked frog and top ranked zebrafish genes, at least one ortholog gene pair, vs the top  $N$  number of genes. Orthology is determined according to BLASTP results. The black curve shows the proportion obtained by a null model in which the same number of genes are randomly selected without replacement from both species. Error bars are the standard error from 30 independent experiments and they are nearly zero so not visible.

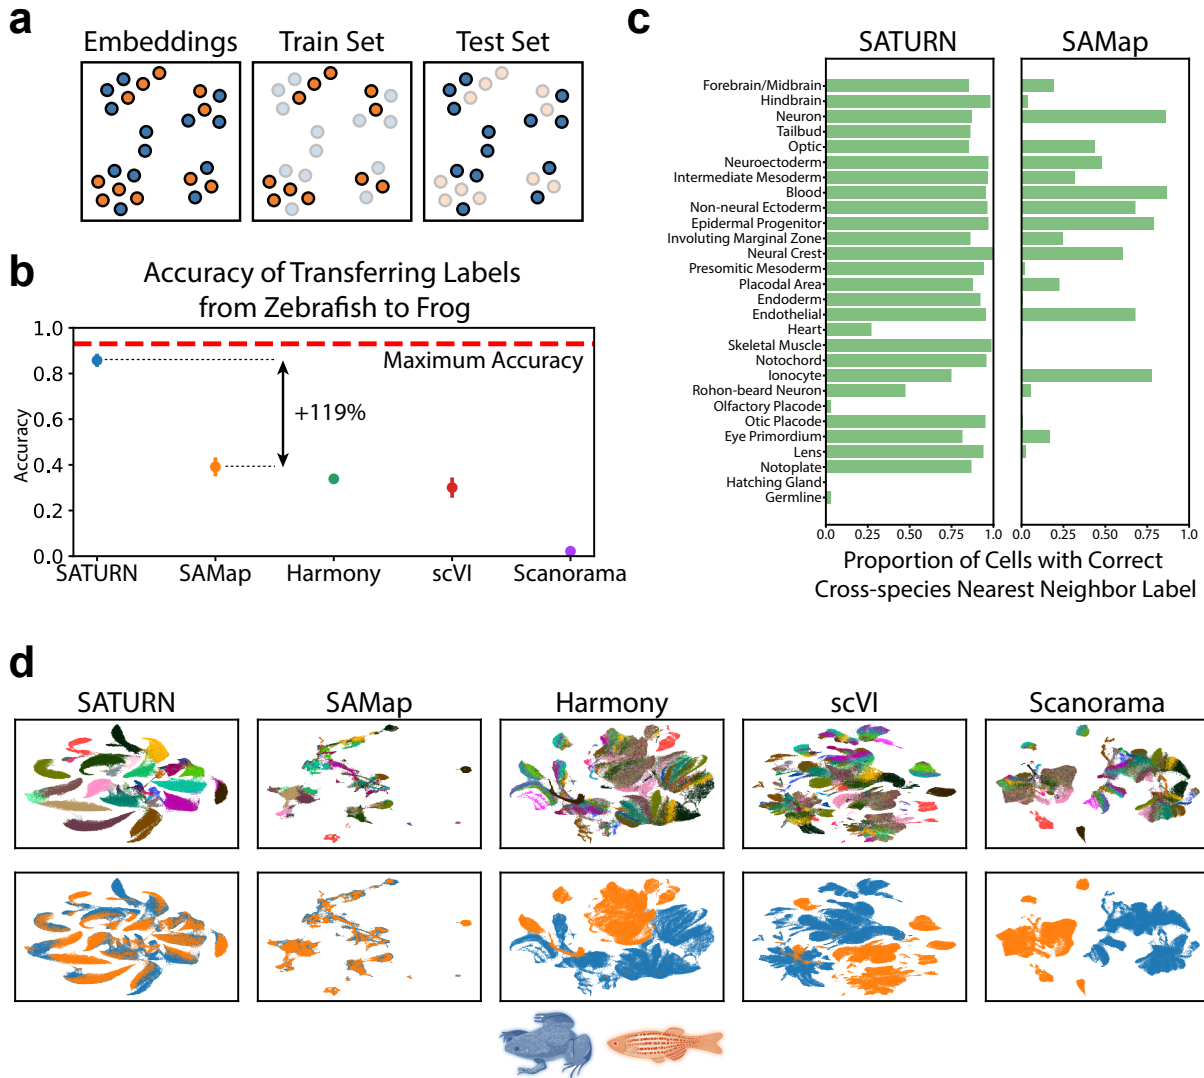

---

**Figure 3 (preceding page): SATURN embeddings capture shared cell type identity in frog and zebrafish em-**

**bryogenesis. (a)** Explanation of how multi-species embeddings are scored. A joint embedding space, containing cells from multiple species, is split by species into a training set and a test set. A classification model to predict cell types is trained on a single species training set, and evaluated on the test set of another species. The maximum test set accuracy achievable will be lower than 100% if the test set species contains specific cell types that can not be predicted by a classifier trained on the training species. Blue color denotes frog, while orange denotes zebrafish. **(b)** Median performance of SATURN compared to alternative methods. The performance is evaluated using the prediction accuracy of a logistic regression model trained to differentiate zebrafish cell types and tested on predicting the cell type annotations of frog cells. Higher values indicate better performance, and 0.93 is the maximum accuracy that can be reached by label transfer on this dataset. SAMap represents a version of the SAMap method in which cell-type annotations are used to integrate datasets. Vertical position of scatter plot points represents the median accuracy score across 30 runs for each method. Error bars represent standard error. For batch correction methods (Harmony, scVI and Scanorama), the input genes are selected as the one to one orthologs determined by ENSEMBL. **(c)** SATURN produces more homogenous clusters than SAMap, and these clusters contain accurate multi species cell types. Bars represent the percentage of cells from zebrafish that are nearest neighbors of frog cells of the given cell type conserved across these two species. Cell types are ordered by frequency. **(d)** Comparison of UMAP visualizations of integrated frog and zebrafish embryogenesis datasets generated by SATURN and alternative methods. In SATURN 's embedding space different cell types naturally form clusters and cells from different species align well. On the other hand, alternative baselines either do not preserve cell type information (SAMap) or can not integrate two species (Harmony, scVI, Scanorama).

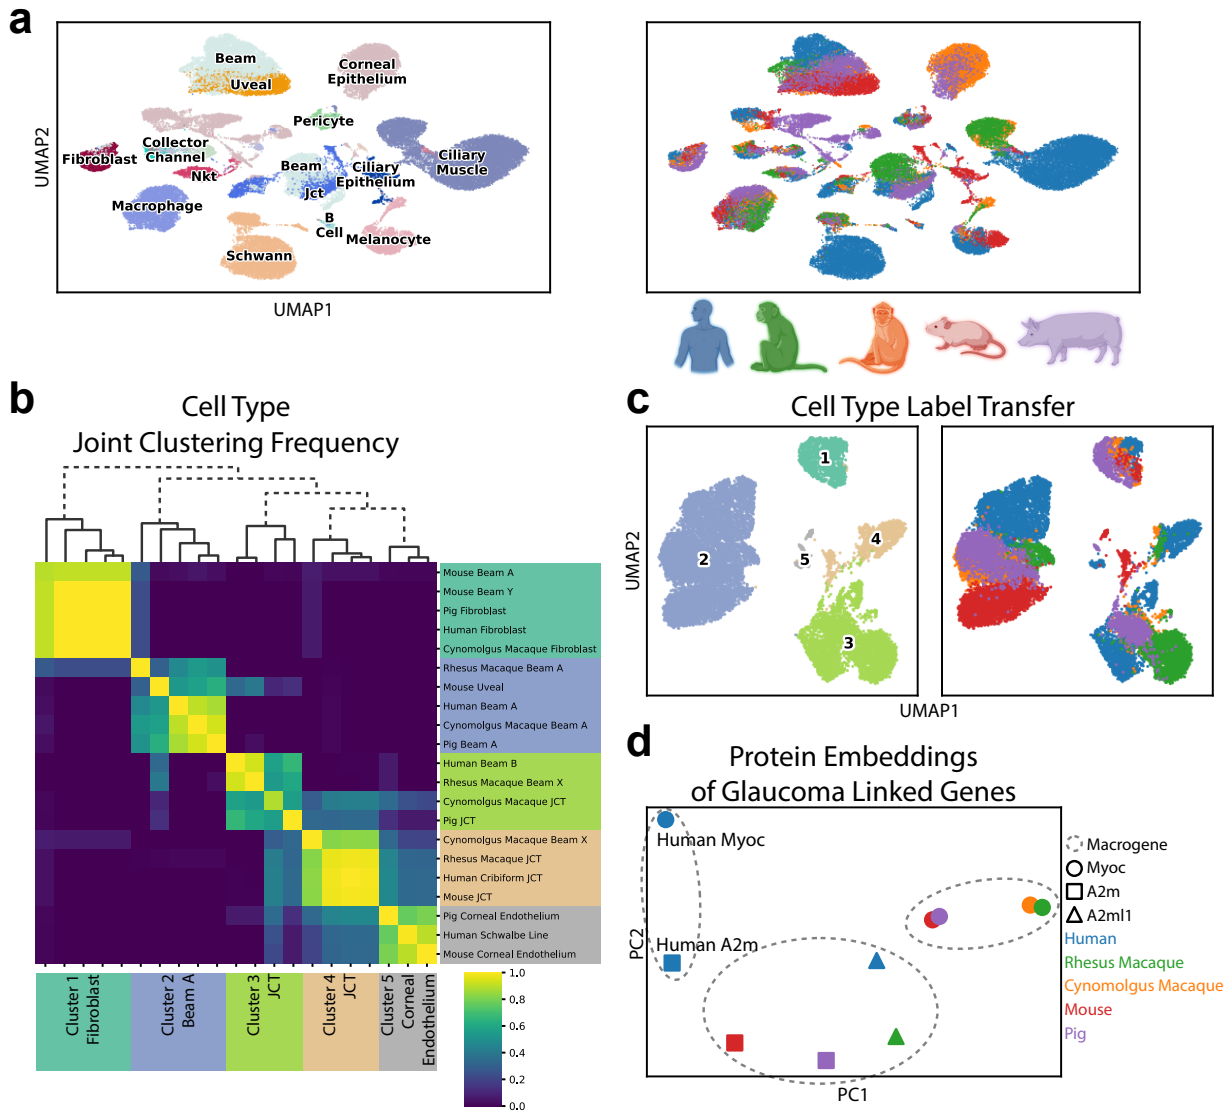

---

**Figure 4 (preceding page): SATURN discovers new cell types and facilitates the analysis of protein embeddings**

**for the Aqueous Humor Outflow cell atlas.** (a) SATURN successfully aligns 50,000 cells from the Aqueous Humor (AH) Outflow cell atlas consisting of five species: human, cynomolgus macaque, rhesus macaque, mouse, and pig. UMAP visualization of SATURN's embeddings where colors denote cell types (left) and species (right). (b, c) We apply SATURN to regroup cell types in a multi-species context. By clustering SATURN's embeddings, we find five broad cell types. (b) Heatmap and dendrogram of reannotated cell types using SATURN. Labels on the right side show original cell type annotations while on the bottom we show reannotations obtained using SATURN. These clusters include cell types originally labeled as fibroblast and beam A/Y cells (cluster 1), beam A and uveal cells (cluster 2), JCT and beam cells (cluster 3 and cluster 4), and corneal endothelium cells (cluster 5). Across 30 independent experiments, we regroup cluster 1 as fibroblast cells, cluster 2 as Beam A cells, clusters 3 and 4 as JCT cells, and cluster 5 as corneal endothelium cells. We specifically reannotate mouse beam A and beam Y cells, which have high expression of fibroblast markers such as *Pi16*, *FBn1*, and *Mfap5* as originally noted [18]. We additionally regroup human beam B cells, which were not found in other species, as JCT cells. Finally, we map beam X cells, which were unique to Rhesus and Cynomolgus macaque, to two JCT clusters. (c) UMAP visualizations of reannotated cell types. Cells are colored according to annotations inferred by SATURN (left) and species information (right). (d) SATURN facilitates the analysis of protein embeddings by creation of multi-species macrogenes. Human *Myoc* has highest weight to a different macrogene than the other four species' *Myoc* variants. The human gene *A2m* also has highest weight to the human *Myoc* macrogene. We can investigate this discrepancy by visualizing the protein embeddings of *Myoc* and *A2m* from all five species using PCA. This analysis offers potential to point to similar function in *A2m* as *Myoc* which would otherwise not be identified by sequence based orthology, as well as potential differences in human *Myoc* and *Myoc* in the other four species.

## Data availability

All analyzed datasets are publicly available. Tabula Sapiens is available at [CellXGene](#). Tabula Microcebus is available at [FigShare](#). Tabula Muris is available at [FigShare](#). For embryogenesis datasets, frog is available with accession code [GSE113074](#) and zebrafish is available in h5ad format at [KleinTools](#). The five species aqueous humor outflow pathway atlas datasets are available with accession code [GSE146188](#).

## Code availability

SATURN was written in Python using the PyTorch library. The source code is available on Github at <https://github.com/snap-stanford/saturn>.

## Acknowledgements

We gratefully acknowledge the support of DARPA under Nos. HR00112190039 (TAMI), N660011924033 (MCS); ARO under Nos. W911NF-16-1-0342 (MURI), W911NF-16-1-0171 (DURIP); NSF under Nos. OAC-1835598 (CINES), OAC-1934578 (HDR), CCF-1918940 (Expeditions), NIH under No. 3U54HG010426-04S1 (HuBMAP), Stanford Data Science Initiative, Wu Tsai Neurosciences Institute, Amazon, Docomo, GSK, Hitachi, Intel, JPMorgan Chase, Juniper Networks, KDDI, NEC, and Toshiba. M.B. acknowledges the EPFL support.

## Author information

M.B., Y.RH. and J.L. conceived the study. Y.RS., M.B., Y.RH. and J.L. performed research, contributed new analytical tools, designed algorithmic framework, analyzed data and wrote the manuscript. Y.RS. performed experiments and developed the software. K.S. and Z.L. contributed

to code.

## References

1. Regev, A. *et al.* The Human Cell Atlas. *eLife* **6** (2017).
2. Tabula Sapiens Consortium *et al.* The Tabula Sapiens: A multiple-organ, single-cell transcriptomic atlas of humans. *Science* **376**, eabl4896 (2022).
3. Tabula Muris Consortium. Single-cell transcriptomics of 20 mouse organs creates a Tabula Muris. *Nature* **562**, 367–372 (2018).
4. Li, H. *et al.* Fly Cell Atlas: A single-nucleus transcriptomic atlas of the adult fruit fly. *Science* **375**, eabk2432 (2022).
5. Lu, T.-C. *et al.* Aging Fly Cell Atlas identifies exhaustive aging features at cellular resolution. *bioRxiv* (2022).
6. Korsunsky, I. *et al.* Fast, sensitive and accurate integration of single-cell data with Harmony. *Nature Methods* **16**, 1289–1296 (2019).
7. Hie, B., Bryson, B. & Berger, B. Efficient integration of heterogeneous single-cell transcriptomes using Scanorama. *Nature Biotechnology* **37**, 685–691 (2019).
8. Lopez, R., Regier, J., Cole, M. B., Jordan, M. I. & Yosef, N. Deep generative modeling for single-cell transcriptomics. *Nature Methods* **15**, 1053–1058 (2018).
9. Amodio, M. *et al.* Exploring single-cell data with deep multitasking neural networks. *Nature Methods* **16**, 1139–1145 (2019).
10. Brbić, M. *et al.* MARS: Discovering novel cell types across heterogeneous single-cell experiments. *Nature Methods* **17**, 1200–1206 (2020).
11. Tarashansky, A. J. *et al.* Mapping single-cell atlases throughout metazoa unravels cell type evolution. *eLife* **10** (2021).
12. Rives, A. *et al.* Biological structure and function emerge from scaling unsupervised learning to 250 million protein sequences. *Proceedings of the National Academy of Sciences of the United States of America* **118** (2021).
13. Elnaggar, A. *et al.* ProtTrans: Toward understanding the language of life through self-supervised learning. *IEEE Transactions on Pattern Analysis and Machine Intelligence* **44**, 7112–7127 (2022).
14. Lin, Z. *et al.* Language models of protein sequences at the scale of evolution enable accurate structure prediction. *bioRxiv* (2022).
15. Kilinc, M., Jia, K. & Jernigan, R. L. Protein language model performs efficient homology detection. *bioRxiv* (2022).
16. Consortium, T. T. M. *et al.* Tabula Microcebus: A transcriptomic cell atlas of mouse lemur, an emerging primate model organism. *BioRxiv* (2021).
17. Briggs, J. A. *et al.* The dynamics of gene expression in vertebrate embryogenesis at single-cell resolution. *Science* **360** (2018).



18. van Zyl, T. *et al.* Cell atlas of aqueous humor outflow pathways in eyes of humans and four model species provides insight into glaucoma pathogenesis. *Proceedings of the National Academy of Sciences of the United States of America* **117**, 10339–10349 (2020).
19. Uhlén, M. *et al.* Tissue-based map of the human proteome. *Science* **347**, 1260419 (2015).
20. Human protein atlas <http://www.proteinatlas.org> .
21. Weisel, N. M. *et al.* Surface phenotypes of naive and memory B cells in mouse and human tissues. *Nature Immunology* **23**, 135–145 (2022).
22. Sprague, J. *et al.* The zebrafish information network (ZFIN): the zebrafish model organism database. *Nucleic Acids Research* **31**, 241–243 (2003).
23. Bradford, Y. M. *et al.* Zebrafish information network, the knowledgebase for danio rerio research. *Genetics* **220** (2022).
24. Cancelas, J. A. & Williams, D. A. Rho GTPases in hematopoietic stem cell functions. *Current Opinion in Hematology* **16**, 249–254 (2009).
25. Montoro, D. T. *et al.* A revised airway epithelial hierarchy includes CFTR-expressing ionocytes. *Nature* **560**, 319–324 (2018).
26. Deprez, M. *et al.* A single-cell atlas of the human healthy airways. *American Journal of Respiratory and Critical Care Medicine* **202**, 1636–1645 (2020).
27. Kolosov, D., Bui, P., Chasiotis, H. & Kelly, S. P. Claudins in teleost fishes. *Tissue Barriers* **1**, e25391 (2013).
28. Altschul, S. F., Gish, W., Miller, W., Myers, E. W. & Lipman, D. J. Basic local alignment search tool. *Journal of Molecular Biology* **215**, 403–410 (1990).
29. Song, Y., Miao, Z., Brazma, A. & Papatheodorou, I. Benchmarking strategies for cross-species integration of single-cell RNA sequencing data. *bioRxiv* (2022).
30. Yates, A. *et al.* The ensembl REST API: ensembl data for any language. *Bioinformatics* **31**, 143–145 (2015).
31. McInnes, L., Healy, J. & Melville, J. UMAP: Uniform manifold approximation and projection for dimension reduction. *Journal of Open Source Software* **3**, 861 (2018).
32. Bai, Y. *et al.* During glaucoma, alpha2-macroglobulin accumulates in aqueous humor and binds to nerve growth factor, neutralizing neuroprotection. *Investigative Ophthalmology & Visual Science* **52**, 5260–5265 (2011).
33. Stoeckius, M. *et al.* Simultaneous epitope and transcriptome measurement in single cells. *Nature Methods* **14**, 865–868 (2017).
34. Xia, C., Fan, J., Emanuel, G., Hao, J. & Zhuang, X. Spatial transcriptome profiling by MERFISH reveals subcellular RNA compartmentalization and cell cycle-dependent gene expression. *Proceedings of the National Academy of Sciences of the United States of America* **116**, 19490–19499 (2019).
35. Jones, M. G., Rosen, Y. & Yosef, N. Interactive, integrated analysis of single-cell transcriptomic and phylogenetic data with PhyloVision. *Cell Reports Methods* **2**, 100200 (2022).

36. Bergen, V., Soldatov, R. A., Kharchenko, P. V. & Theis, F. J. RNA velocity-current challenges and future perspectives. *Molecular Systems Biology* **17**, e10282 (2021).
37. Saelens, W., Cannoodt, R., Todorov, H. & Saeys, Y. A comparison of single-cell trajectory inference methods. *Nature Biotechnology* **37**, 547–554 (2019).
38. Lloyd, S. Least squares quantization in PCM. *IEEE Transactions on Information Theory* **28**, 129–137 (1982).
39. Ba, J. L., Kiros, J. R. & Hinton, G. E. Layer normalization. *arXiv preprint arXiv:1607.06450* (2016).
40. Traag, V. A., Waltman, L. & Van Eck, N. J. From Louvain to Leiden: guaranteeing well-connected communities. *Scientific Reports* **9**, 1–12 (2019).
41. Wolf, F. A., Angerer, P. & Theis, F. J. SCANPY: large-scale single-cell gene expression data analysis. *Genome Biology* **19**, 15 (2018).
